# Supplementary material for: Copper decorated with nanoporous gold by galvanic displacement acts as an efficient electrocatalyst for the electrochemical reduction of CO2
Source: Royal Society of Chemistry journal article supplement (doi:10.1039/d0nr08138h), 2020-12-10
Supplement: d0nr08138h1.pdf [file d0nr08138h1.pdf]

## Supporting Information

### **Copper Decorated Nanoporous Gold by Galvanic Displacement as an Efficient Electrocatalyst for the Electrochemical Reduction of CO<sub>2</sub>**

Zhonggang Liu,<sup>a,b</sup> M. Nur Hossain,<sup>a</sup> Jiali Wen,<sup>a</sup> and Aicheng Chen<sup>a,\*</sup>

<sup>a</sup>Electrochemical Technology Centre, Department of Chemistry, University of Guelph, 50 Stone Road East, Guelph, Ontario N1G 2W1, Canada.

<sup>b</sup>Institutes of Physical Science and Information Technology, Anhui University, Hefei, Anhui, 230601, P. R. China

\*Corresponding author. E-mail address: aicheng@uoguelph.ca (A. Chen).

Tel.: +1 519 8244120 Ext. 54964; Fax: +1 519 7661499

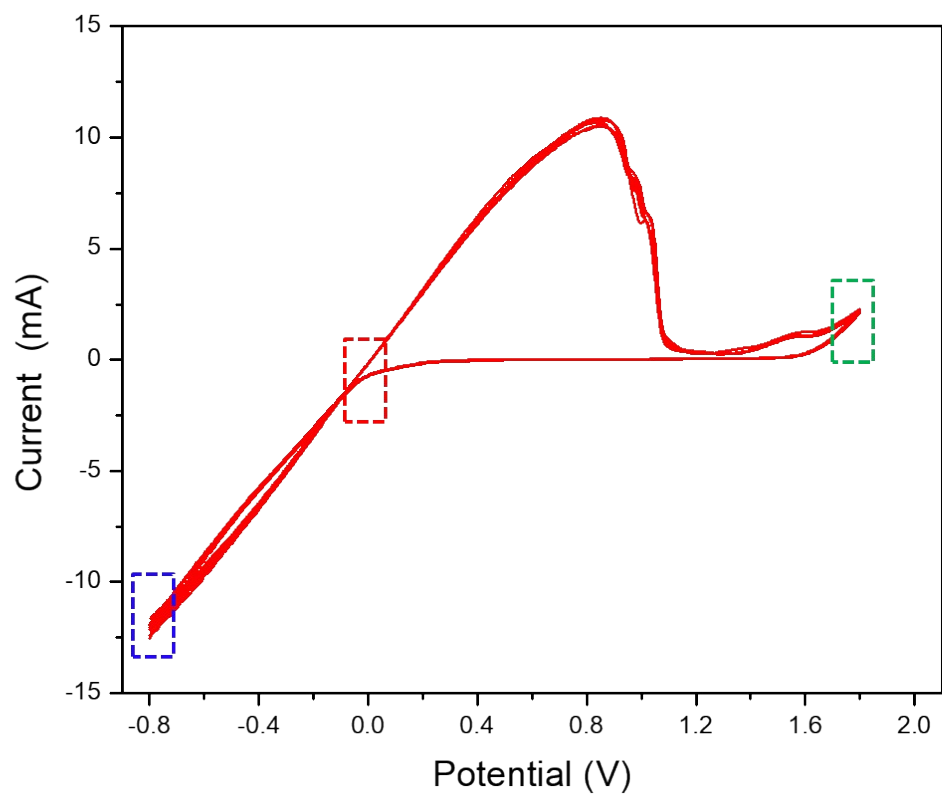

**Fig. S1** Cyclic voltammety curves of a gold wire in  $\text{ZnCl}_2$ /ethylene glycol electrolyte at  $110^\circ\text{C}$ . Scan rate:  $10 \text{ mV s}^{-1}$ .

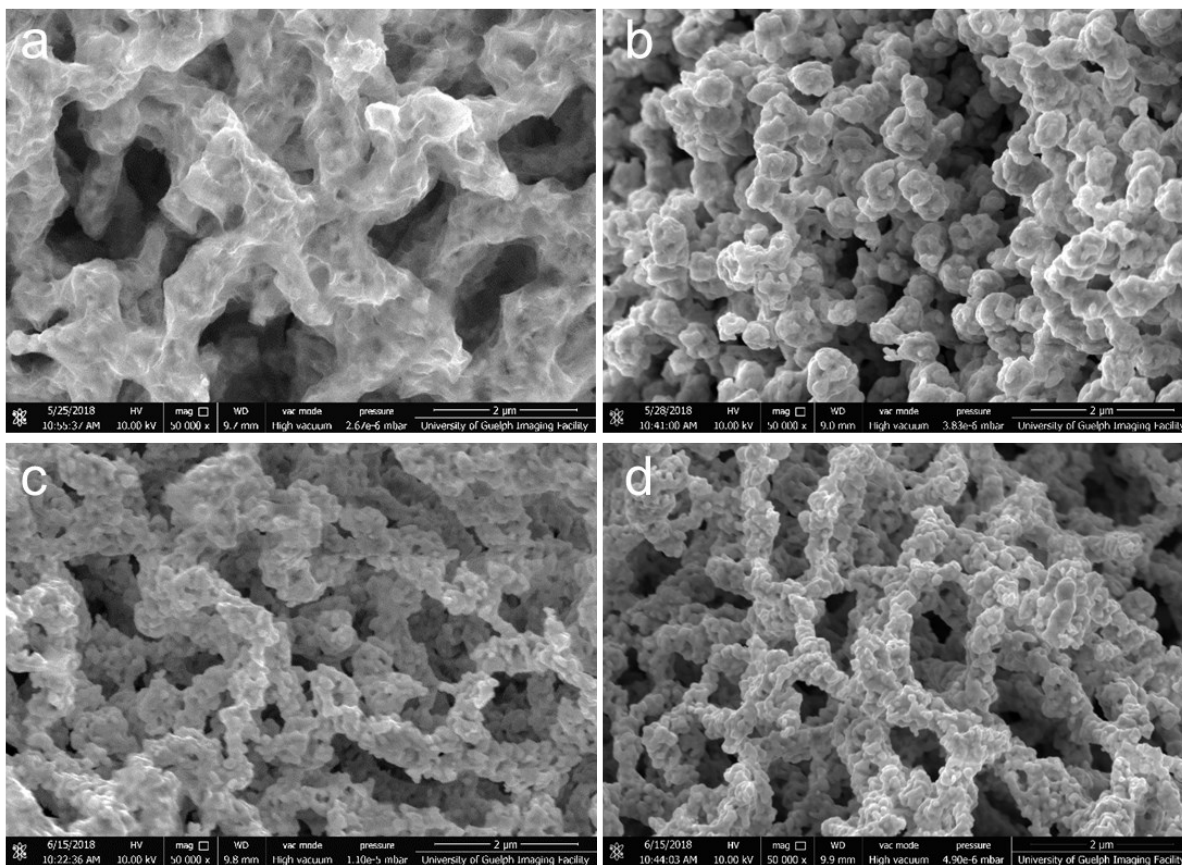

**Fig. S2** SEM images of nanoporous gold with the electrode potential stopped at (a, b)  $-0.80$  V and (c, d)  $+1.8$  V (vs. Zn) prior to (a, c) and following (b, d) immersion in a  $0.5$  M  $\text{Cu(II)}$  solution for  $24$  h.

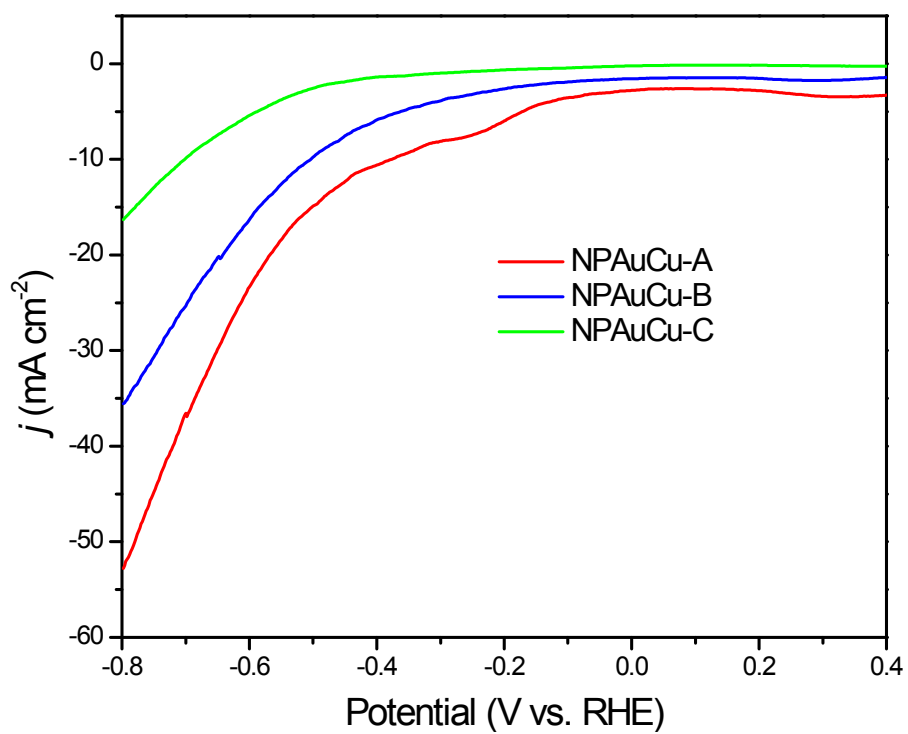

**Fig. S3** LSV curves of NPAuCu electrodes in a CO<sub>2</sub> saturated NaHCO<sub>3</sub> solution (0.1 M), where the NPAu electrodes were fabricated by stopping at 0.0 V (red curve), -0.80 V (blue curve), +1.80 V (green curve) during the electrochemical alloying/dealloying process. Scan rate: 20 mV s<sup>-1</sup>.

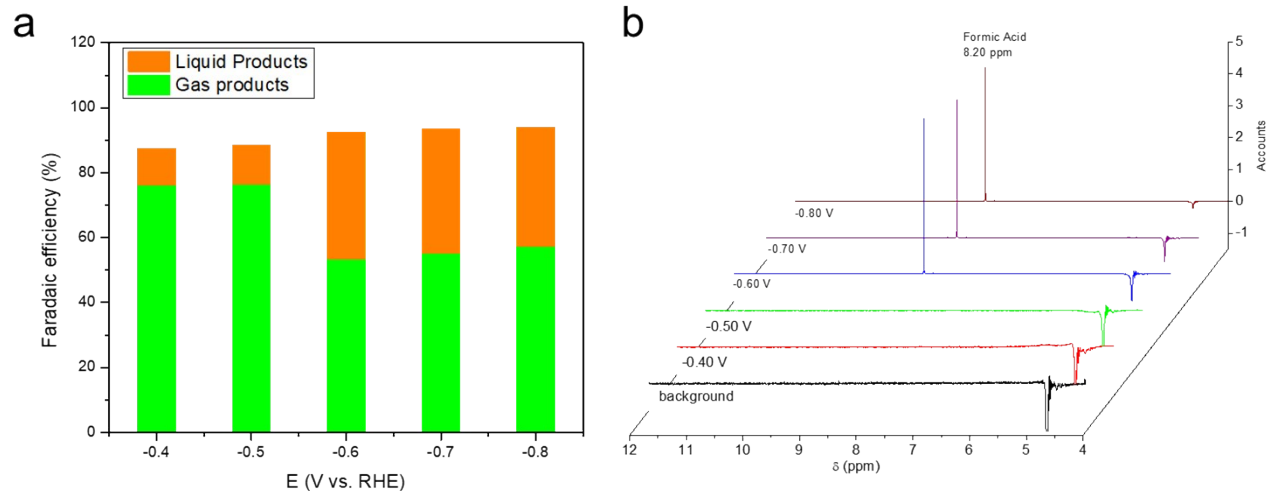

**Fig. S4** (a) FEs for gas and liquid products under various cathodic potentials at the NPAuCu-A electrode. (b)  $^1\text{H}$  NMR spectra for liquid product analysis. The  $\text{CO}_2$  saturated  $\text{NaHCO}_3$  solution without the application of cathodic potential was analyzed as the control (black curve).

**Table S1** The amount of zinc on the surfaces of the different NPAuZn electrodes obtained by ICP-OES.

| Electrode | Zn Amount (nmol) |
|-----------|------------------|
| NPAuZn-A  | 1657.52±584.05   |
| NPAuZn-B  | 1191.01±133.11   |
| NPAuZn-C  | 5.48±2.88        |

**Table S2** The integrated charge and quantity of copper for the different NPAuCu electrodes.

| Electrode | 1 <sup>st</sup> scan |             | 2 <sup>nd</sup> Scan |                |
|-----------|----------------------|-------------|----------------------|----------------|
|           | Q (mC)               | n (nmol)    | Q (μC)               | n (nmol)       |
| NPAuCu-A  | 396 ±11.4            | 2052.0±59.1 | 80.4±10.4            | 0.42±0.05      |
| NPAuCu-B  | 171 ± 26.9           | 886.0±139.0 | 45.87±6.88           | 0.24±0.03      |
| NPAuCu-C  | 0.668 ± 0.101        | 3.5±0.5     | 3.561±0.534          | 0.0018 ±0.0003 |
